# Supplementary material
Source: PubMed Central journal article supplement (PMC150025)
Supplement: plntcell_15_3_719__1.pdf [file plntcell_15_3_719__1.pdf]

**Supplemental Table:** Sequences used for the phylogenetic analysis of CSN and lid subunits.

| <b>Protein</b>                                                   | <b>Species</b>        | <b>Designation</b> | <b>Accession No.</b> |
|------------------------------------------------------------------|-----------------------|--------------------|----------------------|
| <b>CSN1+RPN7</b>                                                 |                       |                    |                      |
| G protein pathway suppressor 1                                   | <i>H.sapiens</i>      | hsCSN1             | U20285               |
| COP9 signalosome subunit 1                                       | <i>D.melanogaster</i> | dmDch1             | AF129080             |
| CSN complex subunit 1                                            | <i>A.thaliana</i>     | atCSN1             | AF395057             |
| signalosome subunit CSN1                                         | <i>S.pombe</i>        | spCsn1             | AF314169             |
| proteasome regulatory particle subunit p44 S10 Rpn7 gene product | <i>H.sapiens</i>      | hs_RPN7            | AF215935             |
| 26S proteasome regulatory particle chain RPN7 homolog            | <i>D.melanogaster</i> | dm_RPN7            | AE003739             |
| 26S proteasome regulatory particle chain RPN7 homolog            | <i>A.thaliana</i>     | at_RPN7            | T06666               |
| probable proteasome regulatory subunit yeast rpn7p homolog       | <i>S.pombe</i>        | sp_RPN7            | Q10335               |
| 26S proteasome regulatory particle chain RPN7                    | <i>S.cerevisiae</i>   | sc_RPN7            | S59773               |
| <b>CSN2+RPN6</b>                                                 |                       |                    |                      |
| signalosome subunit 2                                            | <i>H.sapiens</i>      | hsCSN2             | AF084260             |
| COP9 signalosome subunit 2                                       | <i>D.melanogaster</i> | dmDch2             | AF129079             |
| CSN complex subunit 2                                            | <i>A.thaliana</i>     | atCSN2             | AF395058             |
| signalosome subunit CSN2                                         | <i>S.pombe</i>        | spCsn2             | AF314168             |
| 26S proteasome subunit 9                                         | <i>H.sapiens</i>      | hs_RPN6            | Af001212             |
| Rpn6 gene product                                                | <i>D.melanogaster</i> | dm_RPN6            | AE003813             |
| putative 26S proteasome subunits                                 | <i>A.thaliana</i>     | at_RPN6            | AF370203             |
| 26S proteasome regulatory subunit                                | <i>S.pombe</i>        | sp_RPN6            | AL138854             |
| 26S proteasome regulatory complex chain RPN6                     | <i>S.cerevisiae</i>   | sc_RPN6            | S67639               |
| <b>CSN3+RPN3</b>                                                 |                       |                    |                      |
| COP9 subunit 3                                                   | <i>H.sapiens</i>      | hsCSN3             | BC001891             |
| COP9 signalosome subunit 3                                       | <i>D.melanogaster</i> | dmDch3             | AF129081             |
| COP9 signalosome subunit 3                                       | <i>A.thaliana</i>     | atCSN3             | AF361759             |
| proteasome subunit p58                                           | <i>H.sapiens</i>      | hs_RPN3            | D67025               |
| probable 26S proteasome regulatory subunit S3                    | <i>D.melanogaster</i> | dm_RPN3            | P25161               |
| probable 26S proteasome regulatory subunit S3                    | <i>A.thaliana</i>     | at_RPN3            | Q9LNU4               |
| probable 26S proteasome regulatory subunit S3                    | <i>S.pombe</i>        | sp_RPN3            | O42897               |
| 26S proteasome regulatory subunit RPN3                           | <i>S.cerevisiae</i>   | sc_RPN3            | P40016               |
| hypothetical protein SPAC82102.c                                 | <i>S.pombe</i>        | spCSN3-like        | T41713               |
| <b>CSN4+RPN5</b>                                                 |                       |                    |                      |
| COP9 complex subunit 4                                           | <i>H.sapiens</i>      | hsCSN4             | AF100757             |
| COP9 signalosome subunit 4                                       | <i>D.melanogaster</i> | dmDch4             | AF129082             |
| COP8                                                             | <i>A.thaliana</i>     | atCSN4             | Af176089             |
| putative COP9 complex subunit; contains PCI domain               | <i>S.pombe</i>        | spCsn4             | Z99295               |
| 26S proteasome subunit p55                                       | <i>H.sapiens</i>      | hs_RPN5            | AB003103             |
| Rpn5 gene product                                                | <i>D.melanogaster</i> | dm_RPN5            | AE003601             |
| 26S proteasome p55 protein-like                                  | <i>A.thaliana</i>     | at_RPN5            | AB016893             |
| 26S proteasome complex; yeast Rpn5 homolog                       | <i>S.pombe</i>        | sp_RPN5            | AL590902             |
| 26S proteasome regulatory complex chain RPN5                     | <i>S.cerevisiae</i>   | sc_RPN5            | S67695               |
| <b>CSN5+RPN11</b>                                                |                       |                    |                      |
| COP9 subunit 5                                                   | <i>H.sapiens</i>      | hsCSN5             | XP_011713            |
| COP9 signalosome subunit 5                                       | <i>D.melanogaster</i> | dmDch5             | AF129083             |
| CSN complex subunit 5A                                           | <i>A.thaliana</i>     | atCSN51            | AF395061             |
| COP9/signalosome complex subunit5                                | <i>S.pombe</i>        | spCsn5             | AL035064             |
| 26S proteasome-associated pad1 homolog                           | <i>H.sapiens</i>      | hs_RPN11           | U86782               |
| Rpn11 gene product                                               | <i>D.melanogaster</i> | dm_RPN11           | AE003608             |

|                                                |                       |             |           |
|------------------------------------------------|-----------------------|-------------|-----------|
| 26S proteasome ,non-ATPase regulatory subunit  | <i>A.thaliana</i>     | at_RPN11    | AB025633  |
| pad1 protein; 26S proteasome subunit           | <i>S.pombe</i>        | sp_RPN11    | Z98979    |
| 26S proteasome regulatory particle chain RPN11 | <i>S.cerevisiae</i>   | sc_RPN11    | S56259    |
| <b>CSN6+RPN8</b>                               |                       |             |           |
| COP9 subunit 6(MOV34 homolog,34KD)             | <i>H.sapiens</i>      | hsCSN6      | U70735    |
| COP9 complex homolog subunit 6                 | <i>D.melanogaster</i> | dmDch6      | NP_524451 |
| CSN complex subunit 6A                         | <i>A.thaliana</i>     | atCSN61     | AF395063  |
| proteasome subunit p40/Mov34 protein           | <i>H.sapiens</i>      | hs_RPN8     | D50063    |
| 26S proteasome regulatory subunit S12          | <i>D.melanogaster</i> | dm_RPN8     | P26270    |
| 26S proteasome regulatory subunit S12          | <i>A.thaliana</i>     | at_RPN8     | AC073395  |
| 26S proteasome regulatory subunit 12           | <i>S.pombe</i>        | sp_RPN8     | T41067    |
| 26S proteasome regulatory particle chain RPN8  | <i>S.cerevisiae</i>   | sc_RPN8     | S67158    |
| <b>CSN7+RPN9</b>                               |                       |             |           |
| COP9 complex subunit 7                         | <i>H.sapiens</i>      | hsCSN7      | AF210052  |
| CG2038 gene product                            | <i>D.melanogaster</i> | dmCSN7      | AAF59097  |
| CSN complex subunit 7                          | <i>A.thaliana</i>     | atCSN7 ii   | AF395066  |
| COP9/signalosome complex subunit 7             | <i>S.pombe</i>        | spCSN7      | Q9UUJ7    |
| 26S proteasome subunit p40.5                   | <i>H.sapiens</i>      | hs_RPN9     | AF107837  |
| 26S proteasome regulatory complex subunit p39A | <i>D.melanogaster</i> | dm_RPN9     | AF145311  |
| 26S proteasome subunit-like protein            | <i>A.thaliana</i>     | at_RPN9     | AB012245  |
| 19S proteasome regulatory subunit              | <i>S.pombe</i>        | sp_RPN9     | A1135751  |
| 26S proteasome regulatory particle chain RPN9  | <i>S.cerevisiae</i>   | sc_RPN9     | S69708    |
| <b>CSN8+RPN12</b>                              |                       |             |           |
| COP9 signalosome subunit 1                     | <i>H.sapiens</i>      | hsCSN8      | U51205    |
| CSN complex subunit 8                          | <i>A.thaliana</i>     | atCSN8      | AF395067  |
| 26S proteasome subunit                         | <i>H.sapiens</i>      | hs_RPN12    | D38047    |
| 26S proteasome regulatory complex subunit p30  | <i>D.melanogaster</i> | dm_RPN12    | AF145314  |
| proteasome regulatory subunit, putative        | <i>A.thaliana</i>     | at_RPN12    | NP_176633 |
| 26S proteasome regulatory subunit              | <i>S.pombe</i>        | sp_RPN12    | X92682    |
| 26S proteasome regulatory complex chain RPN12  | <i>S.cerevisiae</i>   | sc_RPN12    | S27434    |
| CG13383 gene product                           | <i>D.melanogaster</i> | dmCSN8-like | Q9VLN4    |
